# Supplementary material
Source: publisher figshare collection journal article supplement (https://aacr.figshare.com/articles/dataset/_/22433295)
Supplement: Supplementary file 1 [file 39879732]

**A**

**PDGF C High**

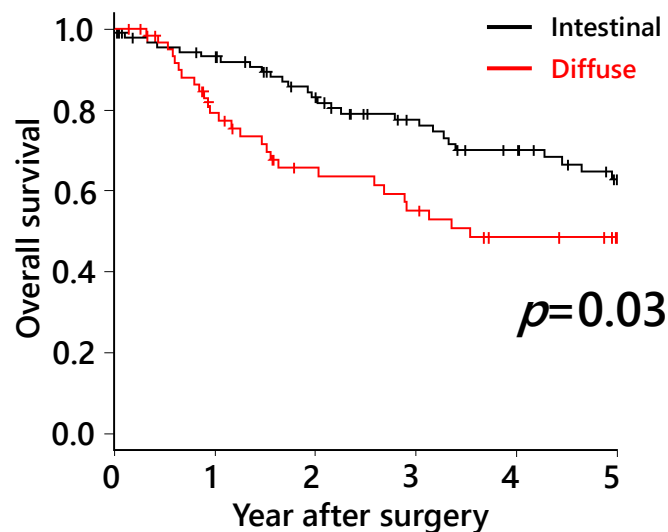

|            |    |    |    |    |    |    |
|------------|----|----|----|----|----|----|
| Intestinal | 90 | 79 | 64 | 51 | 43 | 29 |
| Diffuse    | 62 | 43 | 31 | 26 | 20 | 16 |

**PDGF D High**

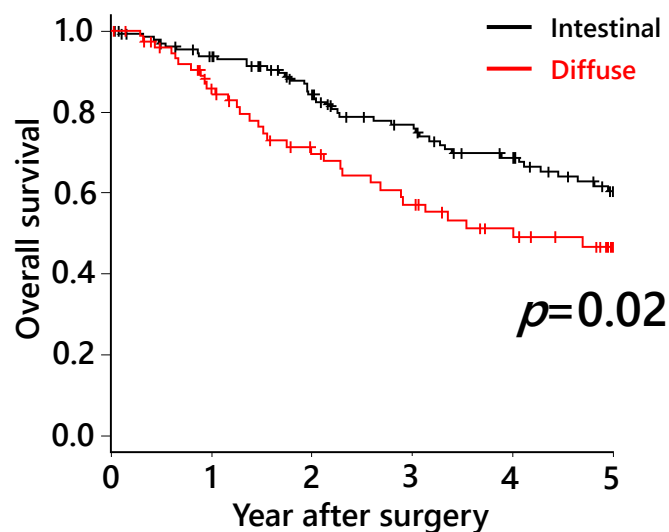

|            |     |     |    |    |    |    |
|------------|-----|-----|----|----|----|----|
| Intestinal | 132 | 116 | 95 | 78 | 65 | 43 |
| Diffuse    | 76  | 57  | 40 | 32 | 24 | 13 |

**B**

**PDGF C Low**

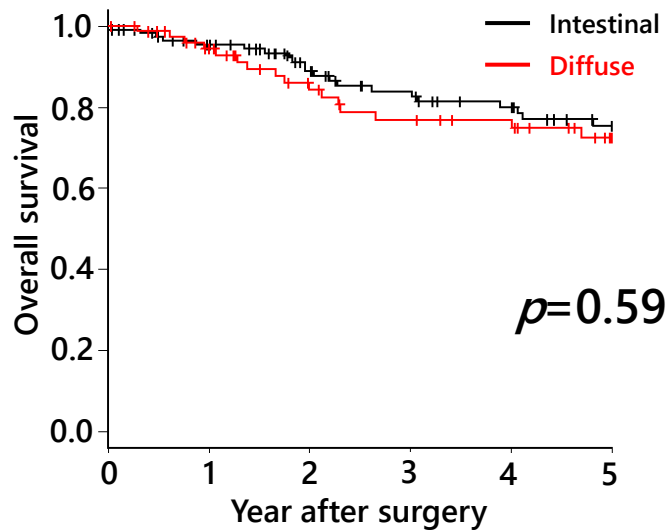

|            |     |    |    |    |    |    |
|------------|-----|----|----|----|----|----|
| Intestinal | 111 | 97 | 78 | 65 | 57 | 46 |
| Diffuse    | 75  | 63 | 47 | 41 | 38 | 27 |

**PDGF D Low**

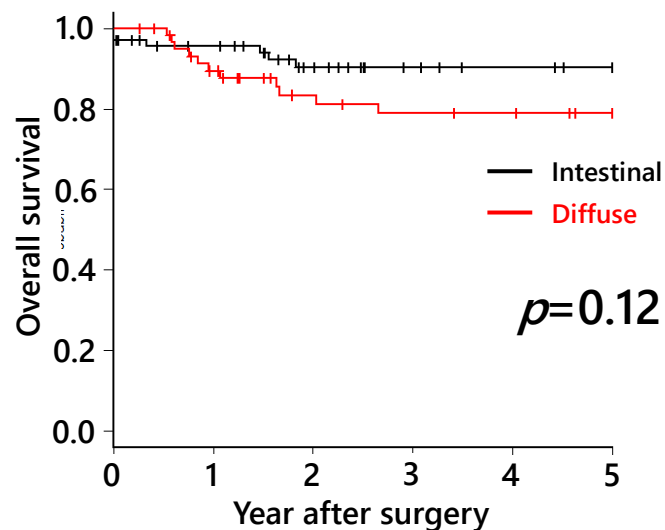

|            |    |    |    |    |    |    |
|------------|----|----|----|----|----|----|
| Intestinal | 69 | 60 | 47 | 38 | 35 | 32 |
| Diffuse    | 61 | 49 | 38 | 35 | 34 | 30 |
